# Supplementary material for: Proteomic Analysis of Pleural Effusions from COVID-19 Deceased Patients: Enhanced Inflammatory Markers
Source: MDPI journal article supplement (doi:10.3390/diagnostics12112789), 2022-11-14
Supplement: s1 [file s1]

**Supplementary Table S1. List of 184 protein biomarkers in the Olink® Target 96 Inflammation and Olink® Target 96 Organ Damage panels**

| <b>Protein Name</b>                                              | <b>Gene Name</b> | <b>Uniprot ID</b> |
|------------------------------------------------------------------|------------------|-------------------|
| Adhesion G-protein coupled receptor G1                           | ADGRG1           | Q9Y653            |
| Anterior gradient protein 2 homolog (AG-2)                       | AGR2             | O95994            |
| Apoptosis-inducing factor 1, mitochondrial                       | AIFM1            | O95831            |
| Aldehyde dehydrogenase, dimeric NADP-preferring                  | ALDH3A1          | P30838            |
| Protein amnionless                                               | AMN              | Q9BXJ7            |
| Renin receptor                                                   | ATP6AP2          | O75787            |
| BMP and activin membrane-bound inhibitor homolog                 | BAMBI            | Q13145            |
| B-cell scaffold protein with ankyrin repeats                     | BANK1            | Q8NDB2            |
| BH3-interacting domain death agonist                             | BID              | P55957            |
| Probetacellulin                                                  | BTC              | P35070            |
| Carbonic anhydrase 12                                            | CA12             | O43570            |
| Carbonic anhydrase 14                                            | CA14             | Q9ULX7            |
| Calcitonin                                                       | CALCA            | P01258            |
| Calreticulin                                                     | CALR             | P27797            |
| Macrophage-capping protein                                       | CAPG             | P40121            |
| Cocaine esterase                                                 | CES2             | O00748            |
| C-type lectin domain family 1 member A                           | CLEC1A           | Q8NC01            |
| Claspin (hClaspin)                                               | CLSPN            | Q9HAW4            |
| Contactin-2                                                      | CNTN2            | Q02246            |
| Corticoliberin                                                   | CRH              | P06850            |
| Casein kinase I isoform delta (CKI-delta)                        | CSNK1D           | P48730            |
| Dipeptidyl aminopeptidase-like protein 6                         | DPP6             | P42658            |
| Desmoglein-4                                                     | DSG4             | Q86SJ6            |
| EGF-like repeat and discoidin I-like domain-containing protein 3 | EDIL3            | O43854            |
| Epidermal growth factor-like protein 7 (EGF-like protein 7)      | EGFL7            | Q9UHF1            |
| Protein enabled homolog                                          | ENAH             | Q8N8S7            |
| Ectonucleoside triphosphate diphosphohydrolase 2 (NTPDase 2)     | ENTPD2           | Q9Y5L3            |
| Ectonucleoside triphosphate diphosphohydrolase 6 (NTPDase 6)     | ENTPD6           | O75354            |
| Erythropoietin                                                   | EPO              | P01588            |
| Protein LAP2                                                     | ERBB2IP          | Q96RT1            |
| Fatty acid-binding protein 9                                     | FABP9            | Q0Z7S8            |
| Tyrosine-protein kinase Fes/Fps                                  | FES              | P07332            |
| Tyrosine-protein kinase Fgr                                      | FGR              | P09769            |
| Peptidyl-prolyl cis-trans isomerase FKBP1B (PPIase FKBP1B)       | FKBP1B           | P68106            |
| Protein fosB                                                     | FOSB             | P53539            |
| Forkhead box protein O1                                          | FOXO1            | Q12778            |
| Polypeptide N-acetylgalactosaminyltransferase 10                 | GALNT10          | Q86SR1            |
| Hematopoietic prostaglandin D synthase (H-PGDS)                  | HPGDS            | O60760            |
| Phosphatidylinositol 3,4,5-trisphosphate 5-phosphatase 2         | INPPL1           | O15357            |
| Integrin beta-1-binding protein 1                                | ITGB1BP1         | O14713            |
| Kidney Injury Molecule                                           | KIM1             | Q96D42            |
| Killer cell immunoglobulin-like receptor 3DL1                    | KIR3DL1          | P43629            |
| Linker for activation of T-cells family member 2                 | LAT2             | Q9GZY6            |
| Lutropin subunit beta (Lutropin beta chain)                      | LHB              | P01229            |
| Prolow-density lipoprotein receptor-related protein 1 (LRP-1)    | LRP1             | Q07954            |

|                                                                                           |          |        |
|-------------------------------------------------------------------------------------------|----------|--------|
| Leukotriene A-4 hydrolase (LTA-4 hydrolase)                                               | LTA4H    | P09960 |
| Macrophage erythroblast attacher                                                          | MAEA     | Q7L5Y9 |
| Melanoma-associated antigen D1                                                            | MAGED1   | Q9Y5V3 |
| Mitogen-activated protein kinase kinase kinase 5                                          | MAP4K5   | Q9Y4K4 |
| Protein max                                                                               | MAX      | P61244 |
| Methionine aminopeptidase 1 (MAP 1)                                                       | METAP1   | P53582 |
| Mevalonate kinase (MK)                                                                    | MVK      | Q03426 |
| Nibrin                                                                                    | NBN      | O60934 |
| Neutrophil cytosol factor 2 (NCF-2)                                                       | NCF2     | P19878 |
| Nitric oxide synthase, endothelial                                                        | NOS3     | P29474 |
| C-type natriuretic peptide                                                                | NPPC     | P23582 |
| NEDD8 ultimate buster 1                                                                   | NUB1     | Q9Y5A7 |
| Nucleobindin-2                                                                            | NUCB2    | P80303 |
| Programmed cell death protein 1 (Protein PD-1)                                            | PDCD1    | Q15116 |
| Platelet-derived growth factor C (PDGF-C)                                                 | PDGFC    | Q9NRA1 |
| [Pyruvate dehydrogenase [acetyl-transferring]]-phosphatase 1, mitochondrial (PDP 1)       | PDP1     | Q9P0J1 |
| Placenta growth factor (PlGF)                                                             | PGF      | P49763 |
| Perilipin-1                                                                               | PLIN1    | O60240 |
| Plexin domain-containing protein 1                                                        | PLXDC1   | Q8IUK5 |
| Serum paraoxonase/arylesterase 2 (PON 2)                                                  | PON2     | Q15165 |
| Protein phosphatase 1B                                                                    | PPM1B    | O75688 |
| 5'-AMP-activated protein kinase subunit beta-1 (AMPK subunit beta-1)                      | PRKAB1   | Q9Y478 |
| Interferon-inducible double-stranded RNA-dependent protein kinase activator A             | PRKRA    | O75569 |
| Proteasome subunit alpha type-1                                                           | PSMA1    | P25786 |
| Inactive tyrosine-protein kinase 7                                                        | PTK7     | Q13308 |
| Pleiotrophin (PTN)                                                                        | PTN      | P21246 |
| Receptor-type tyrosine-protein phosphatase eta (Protein-tyrosine phosphatase eta)         | PTPRJ    | Q12913 |
| Parvalbumin alpha                                                                         | PVALB    | P20472 |
| Paxillin                                                                                  | PXN      | P49023 |
| Retinoic acid receptor responder protein 1                                                | RARRES1  | P49788 |
| Ras GTPase-activating protein 1 (GAP)                                                     | RASA1    | P20936 |
| Ras association domain-containing protein 2                                               | RASSF2   | P50749 |
| REST corepressor 1                                                                        | RCOR1    | Q9UKL0 |
| Ribonucleoside-diphosphate reductase subunit M2 B                                         | RRM2B    | Q7LG56 |
| Serpin A9                                                                                 | SERPINA9 | Q86WD7 |
| NAD-dependent protein deacylase sirtuin-5, mitochondrial                                  | SIRT5    | Q9NXA8 |
| Mothers against decapentaplegic homolog 1 (MAD homolog 1)                                 | SMAD1    | Q15797 |
| CMP-N-acetylneuraminate-beta-galactosamide-alpha-2,3-sialyltransferase 1 (Alpha 2,3-ST 1) | ST3GAL1  | Q11201 |
| Syntaxin-8                                                                                | STX8     | Q9UNK0 |
| Syntaxin-binding protein 3                                                                | STXBP3   | O00186 |
| Fructose-2,6-bisphosphatase TIGAR                                                         | TIGAR    | Q9NQ88 |
| Enteropeptidase                                                                           | TMPRSS15 | P98073 |
| Troponin I, cardiac muscle                                                                | TNNI3    | P19429 |
| DNA topoisomerase 2-beta                                                                  | TOP2B    | Q02880 |
| Vasohibin-1                                                                               | VASH1    | Q7L8A9 |

|                                                               |            |        |
|---------------------------------------------------------------|------------|--------|
| Wiskott-Aldrich syndrome protein (WASp)                       | WAS        | P42768 |
| Tyrosine-protein kinase Yes                                   | YES1       | P07947 |
| Eukaryotic translation initiation factor 4E-binding protein 1 | 4E-BP1     | Q13541 |
| Adenosine Deaminase                                           | ADA        | P00813 |
| Artemin                                                       | ARTN       | Q5T4W7 |
| Axin-1                                                        | AXIN1      | O15169 |
| Beta-nerve growth factor                                      | Beta-NGF   | P01138 |
| Caspase 8                                                     | CASP-8     | Q14790 |
| Eotaxin-1                                                     | CCL11      | P51671 |
| C-C motif chemokine 19                                        | CCL19      | Q99731 |
| C-C motif chemokine 20                                        | CCL20      | P78556 |
| C-C motif chemokine 23                                        | CCL23      | P55773 |
| C-C motif chemokine 25                                        | CCL25      | O15444 |
| C-C motif chemokine 28                                        | CCL28      | Q9NRJ3 |
| Macrophage inflammatory protein 1-alpha                       | CCL3       | P10147 |
| C-C motif chemokine 4                                         | CCL4       | P13236 |
| Natural killer cell receptor 2B4                              | CD244      | Q9BZW8 |
| CD40L receptor                                                | CD40       | P25942 |
| T-cell surface glycoprotein CD5                               | CD5        | P06127 |
| T cell surface glycoprotein CD6 isoform                       | CD6        | P30203 |
| T-cell surface glycoprotein CD8 alpha chain                   | CD8A       | P01732 |
| CUB domain-containing protein 1                               | CDCP1      | Q9H5V8 |
| Macrophage colony-stimulating factor 1                        | CSF-1      | P09603 |
| Cystatin D                                                    | CST5       | P28325 |
| Fractalkine                                                   | CX3CL1     | P78423 |
| C-X-C motif chemokine 1                                       | CXCL1      | P09341 |
| C-X-C motif chemokine 10                                      | CXCL10     | P02778 |
| C-X-C motif chemokine 11                                      | CXCL11     | O14625 |
| C-X-C motif chemokine 5                                       | CXCL5      | P42830 |
| C-X-C motif chemokine 6                                       | CXCL6      | P80162 |
| C-X-C motif chemokine 9                                       | CXCL9      | Q07325 |
| Delta and Notch-like epidermal growth factor-related receptor | DNER       | Q8NFT8 |
| Protein S100-A12                                              | EN-RAGE    | P80511 |
| Fibroblast growth factor 19                                   | FGF-19     | O95750 |
| Fibroblast growth factor 21                                   | FGF-21     | Q9NSA1 |
| Fibroblast growth factor 23                                   | FGF-23     | Q9GZV9 |
| Fibroblast growth factor 5                                    | FGF-5      | P12034 |
| Fms-related tyrosine kinase 3 ligand                          | Flt3L      | P49771 |
| Glial cell line-derived neurotrophic factor                   | GDNF       | P39905 |
| Hepatocyte growth factor                                      | HGF        | P14210 |
| Interferon gamma                                              | IFN-gamma  | P01579 |
| Interleukin-1 alpha                                           | IL-1 alpha | P01583 |
| Interleukin-10                                                | IL10       | P22301 |
| Interleukin-10 receptor subunit alpha                         | IL-10RA    | Q13651 |
| Interleukin-10 receptor subunit beta                          | IL-10RB    | Q08334 |
| Interleukin-12 subunit beta                                   | IL-12B     | P29460 |
| Interleukin-13                                                | IL13       | P35225 |
| Interleukin-15 receptor subunit alpha                         | IL-15RA    | Q13261 |

|                                                              |           |        |
|--------------------------------------------------------------|-----------|--------|
| Interleukin-17A                                              | IL-17A    | Q16552 |
| Interleukin-17C                                              | IL-17C    | Q9P0M4 |
| Interleukin-18                                               | IL18      | Q14116 |
| Interleukin-18 receptor 1                                    | IL-18R1   | Q13478 |
| Interleukin-2                                                | IL2       | P60568 |
| Interleukin-20                                               | IL-20     | Q9NYY1 |
| Interleukin-20 receptor subunit alpha                        | IL-20RA   | Q9UHF4 |
| Interleukin-22 receptor subunit alpha-1                      | IL-22 RA1 | Q8N6P7 |
| Interleukin-24                                               | IL-24     | Q13007 |
| Interleukin-2 receptor subunit beta                          | IL-2RB    | P14784 |
| Interleukin-33                                               | IL33      | O95760 |
| Interleukin-4                                                | IL4       | P05112 |
| Interleukin-5                                                | IL5       | P05113 |
| Interleukin-6                                                | IL6       | P05231 |
| Interleukin-7                                                | IL7       | P13232 |
| Interleukin-8                                                | IL8       | P10145 |
|                                                              | LAP TGF-  |        |
| Latency-associated peptide transforming growth factor beta 1 | beta-1    | P01137 |
| Leukemia inhibitory factor                                   | LIF       | P15018 |
| Leukemia inhibitory factor receptor                          | LIF-R     | P42702 |
| Monocyte chemotactic protein 1                               | MCP-1     | P13500 |
| Monocyte chemotactic protein 2                               | MCP-2     | P80075 |
| Monocyte chemotactic protein 3                               | MCP-3     | P80098 |
| Monocyte chemotactic protein 4                               | MCP-4     | Q99616 |
| Matrix metalloproteinase-1                                   | MMP-1     | P03956 |
| Matrix metalloproteinase-10                                  | MMP-10    | P09238 |
| Neurturin                                                    | NRTN      | Q99748 |
| Neurotrophin-3                                               | NT-3      | P20783 |
| Osteoprotegerin                                              | OPG       | O00300 |
| Oncostatin-M                                                 | OSM       | P13725 |
| Programmed cell death 1 ligand 1                             | PD-L1     | Q9NZQ7 |
| Stem cell factor                                             | SCF       | P21583 |
| SIR2-like protein 2                                          | SIRT2     | Q8IXJ6 |
| Signaling lymphocytic activation molecule                    | SLAMF1    | Q13291 |
| Sulfotransferase 1A1                                         | ST1A1     | P50225 |
| STAM-binding protein                                         | STAMBP    | O95630 |
| Transforming growth factor alpha                             | TGF-alpha | P01135 |
| Tumor necrosis factor                                        | TNF       | P01375 |
| TNF-beta                                                     | TNFB      | P01374 |
| Tumor necrosis factor receptor superfamily member 9          | TNFRSF9   | Q07011 |
| Tumor necrosis factor ligand superfamily member 14           | TNFSF14   | O43557 |
| TNF-related apoptosis-inducing ligand                        | TRAIL     | P50591 |
| TNF-related activation-induced cytokine                      | TRANCE    | O14788 |
| Thymic stromal lymphopoietin                                 | TSLP      | Q969D9 |
| Tumor necrosis factor (Ligand) superfamily, member 12        | TWEAK     | O43508 |
| Urokinase-type plasminogen activator                         | uPA       | P00749 |
| Vascular endothelial growth factor A                         | VEGFA     | P15692 |
